# Supplementary material for: Health system responsiveness and its associated factors for intrapartum care in conflict affected areas in Amhara region, Ethiopia: a cross-sectional study
Source: HighWire-hosted journal article supplement (doi:10.1136/bmjopen-2023-082507), 2024-07-01
Supplement: bmjopen-2023-082507supp001_data_supplement.pdf [file bmjopen-2023-082507supp001_data_supplement.pdf]

Supplementary table 1 questions used to assess health system responsiveness

| <b>Domains</b>                                                                                                                                   | <b>Response categories</b>              |
|--------------------------------------------------------------------------------------------------------------------------------------------------|-----------------------------------------|
| <b>Dignity (respect for clients)</b>                                                                                                             | Never<br>Sometimes<br>Usually<br>Always |
| How often did doctor, nurses, or other health care providers treat you with respect?                                                             |                                         |
| How often were your physical examinations and treatments done in a way that your privacy was respected?                                          |                                         |
| How often were your physical examinations and treatments done in a way that your privacy was respected?                                          |                                         |
| How often did health care providers encourage you to ask a question about diseases treatment and care?                                           |                                         |
| <b>Confidentiality</b>                                                                                                                           |                                         |
| How often discussed with your health care provider done privately so other people who you did not want to hear could not overhear what was said? |                                         |
| How often did your health care provider keep your personal information confidential?                                                             |                                         |
| <b>Communication</b>                                                                                                                             |                                         |
| How would you rate the health care providers listen carefully to you?                                                                            |                                         |
| How would you rate health professionals greeted in a way that made you feel comfortable?                                                         |                                         |
| How would you rate the health care provider's explanation of things in a way you could understand?                                               |                                         |
| How would you rate health care providers give you time to ask questions about your health problem or treatment?                                  |                                         |
| <b>Autonomy</b>                                                                                                                                  |                                         |
| How often did health care providers provide information on alternative treatment options?                                                        |                                         |
| How often did health care providers involve you in deciding about the care treatment or test?                                                    |                                         |

|                                                                                                                        |                   |
|------------------------------------------------------------------------------------------------------------------------|-------------------|
| How often did health care providers consult you about your preferences over alternative treatment options?             |                   |
| How often did health care providers ask your permission /consent before starting the treatment or tests?               |                   |
| <b>Choice in health care</b>                                                                                           |                   |
| How often health care providers did you have a choice between health care providers in health care unit?               |                   |
| How often the health care providers did you have a choice between health care units?                                   |                   |
| How often health care providers did you have the opportunity to see specialist if you wish?                            |                   |
| <b>Prompt attention</b>                                                                                                |                   |
| How would you rate the traveling time to the health facility?                                                          | Very long         |
| How would you rate the length of time spent for examination or consultation in labour after you reach health facility? | Long<br>Short     |
| How would you rate the care you get, when you wanted, as soon as reasonable?                                           | Very short        |
| How would you rate the amount of time people spend on non-emergency waiting lists?                                     |                   |
| How would you rate Equality in waiting times between different patient groups                                          |                   |
| <b>Quality of basic amenities</b>                                                                                      |                   |
| How would you rate the basic quality of the waiting room, for example, space, sitting and fresh air?                   | Very poor<br>Poor |
| How would you rate the cleanliness of the health care unit?                                                            | Good              |
| How would you rate the maintenance of buildings in health care units?                                                  | Very good         |
| How would you rate access to clean water at health care unit?                                                          |                   |
| How would you rate the cleanliness of the toilets in health care units?                                                |                   |
| <b>Social support</b>                                                                                                  |                   |

|                                                                                                                    |  |
|--------------------------------------------------------------------------------------------------------------------|--|
| How would you rate the freedom to act religious or cultural activities during inpatient (like Prayer...)?          |  |
|                                                                                                                    |  |
| How would you rate the ease of having family and friends to visit you in ward?                                     |  |
| How would you rate the ease of bringing services like food or other consumables by families and relatives in ward? |  |
