# Supplementary figures and images for: Health system responsiveness and its associated factors for intrapartum care in conflict affected areas in Amhara region, Ethiopia: a cross-sectional study
Source: HighWire-hosted journal article supplement (doi:10.1136/bmjopen-2023-082507), 2024-07-01

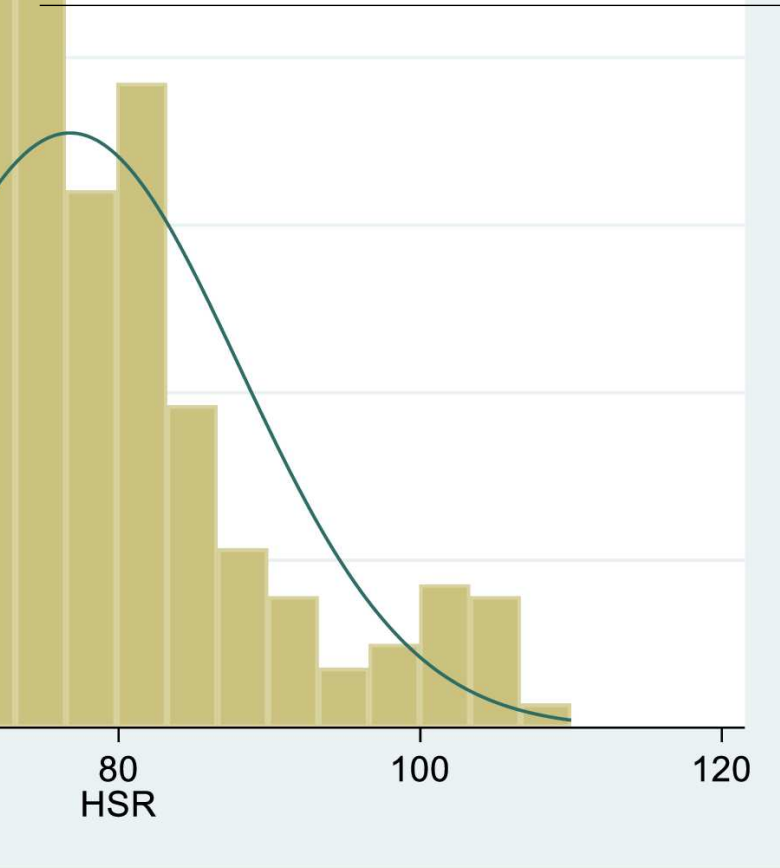

Supplement: bmjopen-2023-082507supp002_data_supplement.pdf [file bmjopen-2023-082507supp002_data_supplement.pdf]
